# Supplementary material for: Nanoscale control and tri-element co-doping of 4.6 V LiCoO2 with excellent rate capability and long-cycling stability for lithium-ion batteries
Source: Royal Society of Chemistry journal article supplement (doi:10.1039/d3dt00112a), 2023-01-01
Supplement: d3dt00112a1.pdf [file d3dt00112a1.pdf]

## Supporting Information

### Nanoscale control and tri-element co-doping toward 4.6V

### LiCoO<sub>2</sub> with excellent rate capability and long-cycling

### stability for lithium-ion batteries

Xun Wang<sup>a</sup>, Zixuan Fang<sup>a</sup>, Xin Hu<sup>a</sup>, Bowen Fu<sup>a</sup>, Tingting Feng<sup>a,b</sup>, Teng Li<sup>a\*</sup>, and Mengqiang  
Wu<sup>a\*,b</sup>

<sup>a</sup> School of Materials and Energy, University of Electronic Science and Technology of China,  
Chengdu 611731, China

<sup>b</sup> The Yangtze Delta Region Institute (Huzhou), University of Electronic Science and  
Technology of China, Huzhou 313001, China

\*Emails: [mwu@uestc.edu.cn](mailto:mwu@uestc.edu.cn) (Mengqiang Wu); [lit1990@uestc.edu.cn](mailto:lit1990@uestc.edu.cn) (Teng Li)

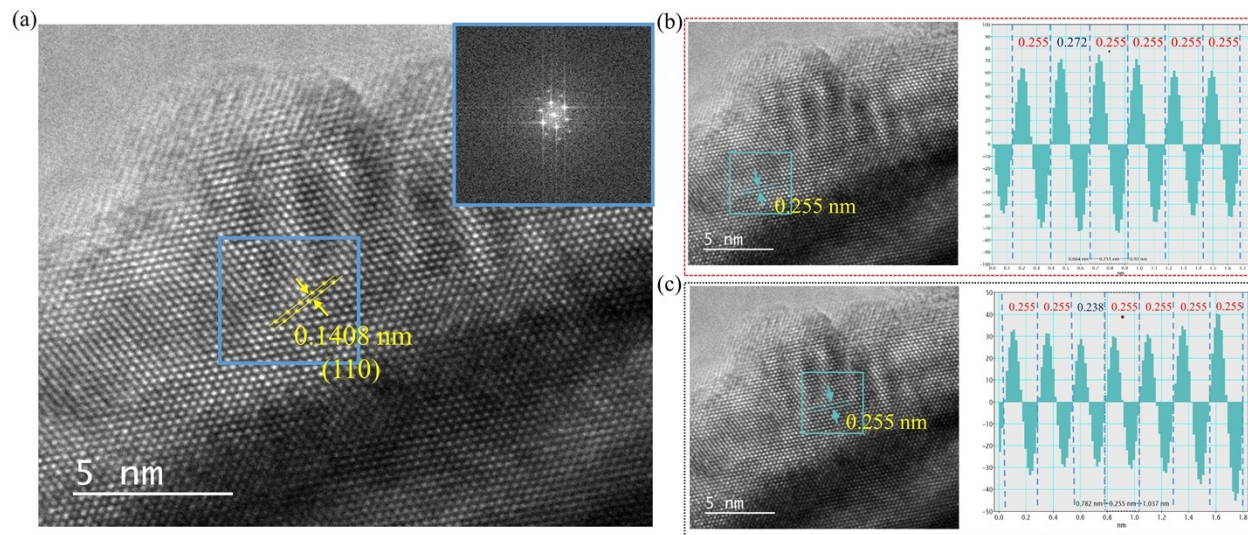

**Figure S1.** (a) Interplanar crystal spacings of crystal plane (110) and corresponding fast Fourier transformation (FFT) calculated from the blue marked regions of CDLCO; (b) TEM image of CDLCO together with the measured lattice spacing for the marked region; (c) TEM image of CDLCO together with the measured lattice spacing for another marked region.

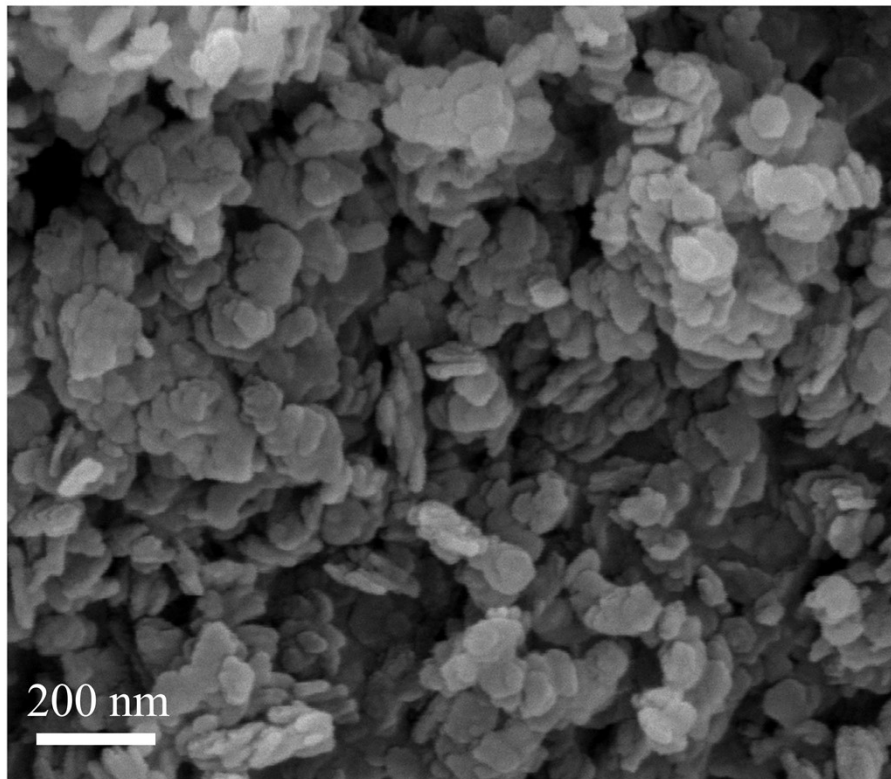

**Figure S2.** SEM image of nano-CoOOH.

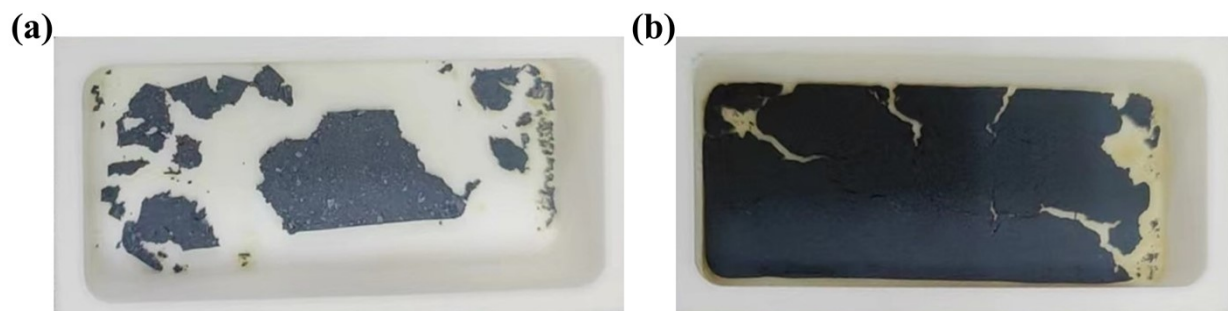

**Figure S3.** Materials synthesized with different precursors under the same reaction conditions: (a) CDLCO by nano-CoOOH precursors, (b) ATMLCO by  $\text{Co}_3\text{O}_4$  precursors.

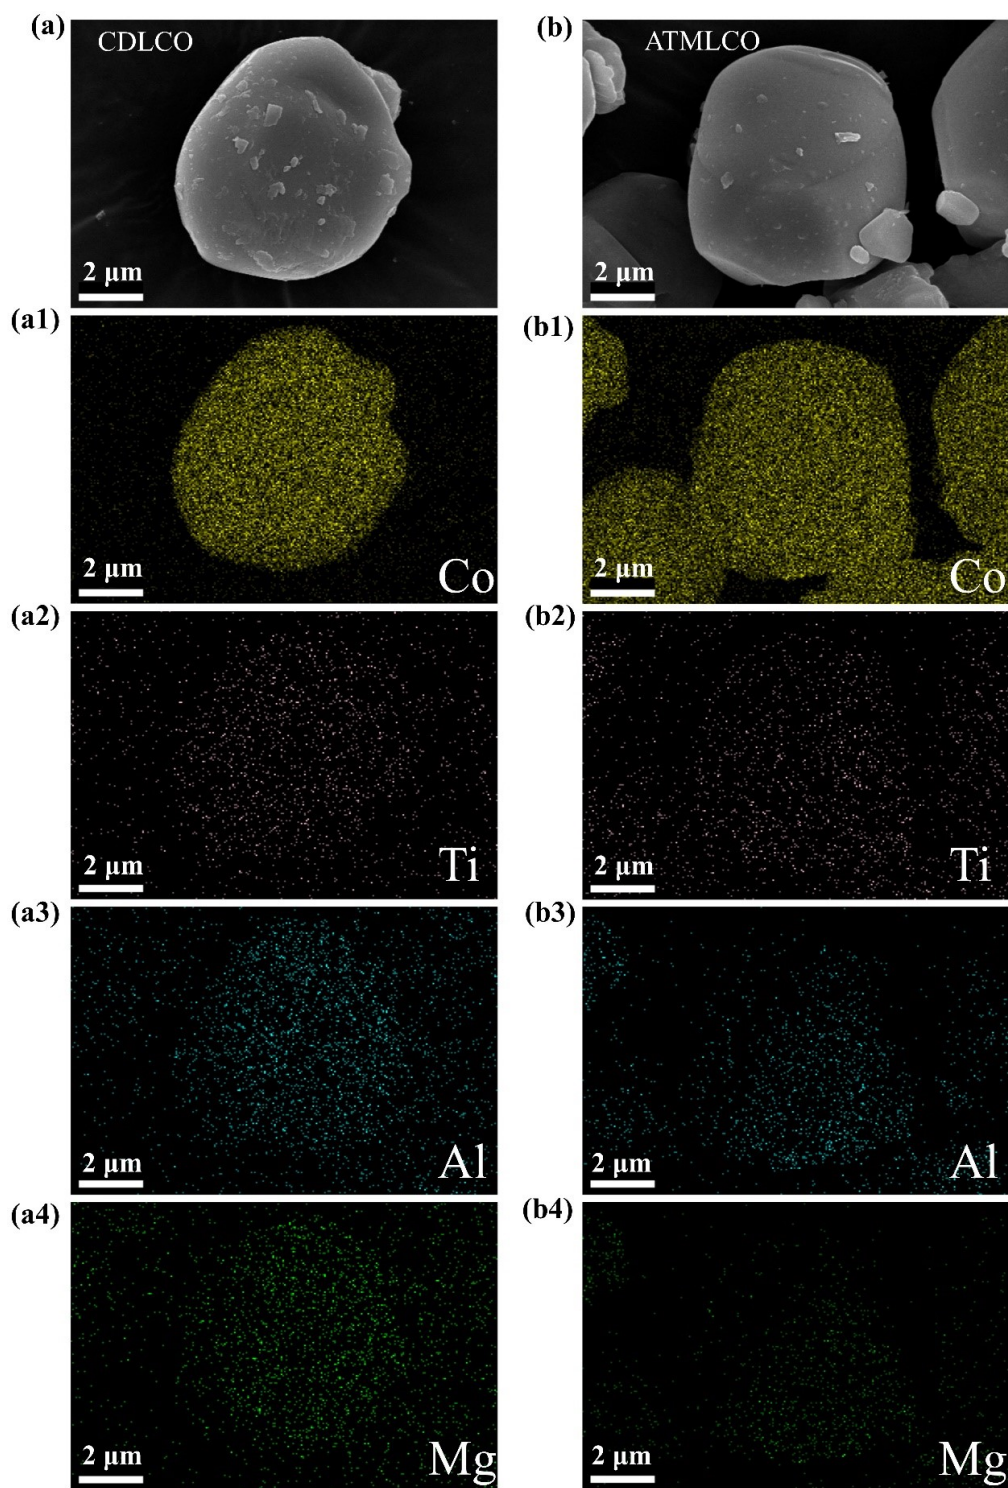

**Figure S4.** SEM and EDS elemental mappings of Co, Ti, Al, Mg: (a-a4) CDLCO, (b-b4) ATMLCO.

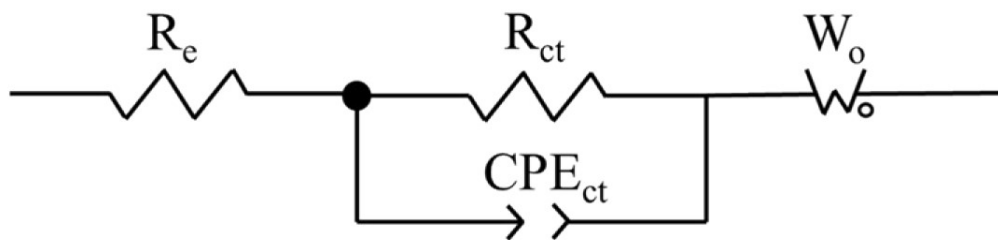

**Figure S5.** The equivalent circuit models used for the fitting of EIS data.

**Table S1.** The doping concentration of Al, Mg, Ti in BLCO and CDLCO obtained from ICP.

| Samples | ICP wt% |        |        |
|---------|---------|--------|--------|
|         | Al      | Mg     | Ti     |
| BLCO    | 0       | 0      | 0      |
| CDLCO   | 0.4908  | 0.1083 | 0.0971 |

**Table S2.** Atoms occupancy of BLCO from Rietveld refinement by the XRD.

| Atom | Site | x | y | z       | Occupancy |
|------|------|---|---|---------|-----------|
| Li   | 3a   | 0 | 0 | 0       | 1         |
| Co   | 3b   | 0 | 0 | 0.5     | 1         |
| O    | 6c   | 0 | 0 | 0.24454 | 1         |

**Table S3.** Atoms occupancy of CDLCO from Rietveld refinement by the XRD.

| Atom | Site | x | y | z      | Occupancy |
|------|------|---|---|--------|-----------|
| Li   | 3a   | 0 | 0 | 0      | 0.996     |
| Mg   | 3a   | 0 | 0 | 0      | 0.004     |
| Co   | 3b   | 0 | 0 | 0.5    | 0.980     |
| Al   | 3b   | 0 | 0 | 0.5    | 0.018     |
| Ti   | 3b   | 0 | 0 | 0.5    | 0.002     |
| O    | 6c   | 0 | 0 | 0.2437 | 1         |

**Table S4.** Comparison of electrochemical properties of the reported LiCoO<sub>2</sub>-based LIBs at the high cut-off voltage of 4.6 V.

| <b>Modified strategies</b>                             | <b>Current density</b>               | <b>Cycle number</b> | <b>Capacity retention</b>          | <b>Ref.</b> |
|--------------------------------------------------------|--------------------------------------|---------------------|------------------------------------|-------------|
| <b>Mg-doping</b>                                       | 270 mA·g <sup>-1</sup>               | 100                 | 84% (158 mAh·g <sup>-1</sup> )     | 1           |
| <b>W-doping</b>                                        | 274 mA·g <sup>-1</sup>               | 100                 | 72.3% (146 mAh·g <sup>-1</sup> )   | 2           |
| <b>Mn doping</b>                                       | 185 mA·g <sup>-1</sup>               | 100                 | 55% (112.2 mAh·g <sup>-1</sup> )   | 3           |
| <b>Ni-Mn co-doping</b>                                 | 185 mA·g <sup>-1</sup>               | 100                 | 52% (103.48 mAh·g <sup>-1</sup> )  | 3           |
| <b>Al-Zn co-doping</b>                                 | 185 mA·g <sup>-1</sup>               | 500                 | 65% (119.6 mAh·g <sup>-1</sup> )   | 4           |
| <b>Al-doping, F coating</b>                            | 27.4 mA·g <sup>-1</sup>              | 200                 | 81.8% (170.7 mAh·g <sup>-1</sup> ) | 5           |
| <b>Mg doping, ZrO<sub>x</sub>F<sub>y</sub> coating</b> | 155 mA·g <sup>-1</sup>               | 100                 | 76.3% (136.6 mAh·g <sup>-1</sup> ) | 6           |
| <b>Ti, Mg, Al co-doping</b>                            | 137 mA·g <sup>-1</sup>               | 100                 | 86% (174 mAh·g <sup>-1</sup> )     | 7           |
| <b>Al-Ti bulk co-doping, Mg surface doping</b>         | 70 mA·g <sup>-1</sup>                | 200                 | 78% (169.9 mAh·g <sup>-1</sup> )   | 8           |
| <b>This work</b>                                       | 1 C<br>(1 C=150 mA·g <sup>-1</sup> ) | 100                 | 94.3% (183.5 mAh·g <sup>-1</sup> ) |             |
| <b>This work</b>                                       | 5 C                                  | 200                 | 98.7% (146.1 mAh·g <sup>-1</sup> ) |             |
| <b>This work</b>                                       | 5 C                                  | 600                 | 91% (134.8 mAh·g <sup>-1</sup> )   |             |



## References

1. Y. Huang, Y. Zhu, H. Fu, M. Ou, C. Hu, S. Yu, Z. Hu, C.-T. Chen, G. Jiang, H. Gu, H. Lin, W. Luo and Y. Huang, *Angew. Chem. Int. Edit.*, 2021, **60**, 4682-4688.
2. J.-N. Zhang, Q.-H. Li, Q. Li, X.-Q. Yu and H. Li, *Chinese Phys. B*, 2018, **27**, 088202.
3. Y. Wang, T. Cheng, Z. Yu, Y. Lyu and B. Guo, *J. Alloys Compd.*, 2020, **842**, 155827.
4. T. Cheng, Z. Ma, R. Qian, Y. Wang, Q. Cheng, Y. Lyu, A. Nie and B. Guo, *Adv. Funct. Mater.*, 2021, **31**, 2001974.
5. J. Qian, L. Liu, J. Yang, S. Li, X. Wang, H. L. Zhuang and Y. Lu, *Nat. Commun.*, 2018, **9**, 4918.
6. Z. Wang, Z. Wang, H. Guo, W. Peng, X. Li, G. Yan and J. Wang, *J. Alloys Compd.*, 2015, **621**, 212-219.
7. J.-N. Zhang, Q. Li, C. Ouyang, X. Yu, M. Ge, X. Huang, E. Hu, C. Ma, S. Li, R. Xiao, W. Yang, Y. Chu, Y. Liu, H. Yu, X.-Q. Yang, X. Huang, L. Chen and H. Li, *Nat. Energy*, 2019, **4**, 594-603.
8. L. Wang, J. Ma, C. Wang, X. Yu, R. Liu, F. Jiang, X. Sun, A. Du, X. Zhou and G. Cui, *Adv. Sci.*, 2019, **6**, 1900355.
